# Supplementary material for: Ecological speciation in sympatric palms: 2. Pre‐ and post‐zygotic isolation
Source: PubMed Central journal article supplement (PMC5096058; doi:10.1111/jeb.12933), 2016-07-20

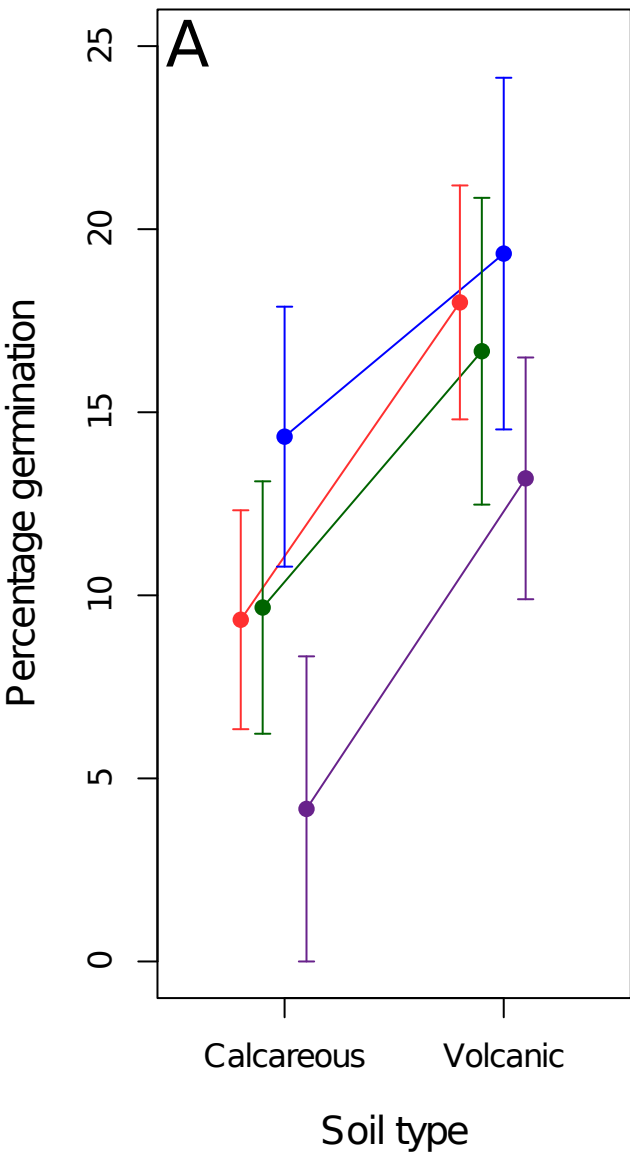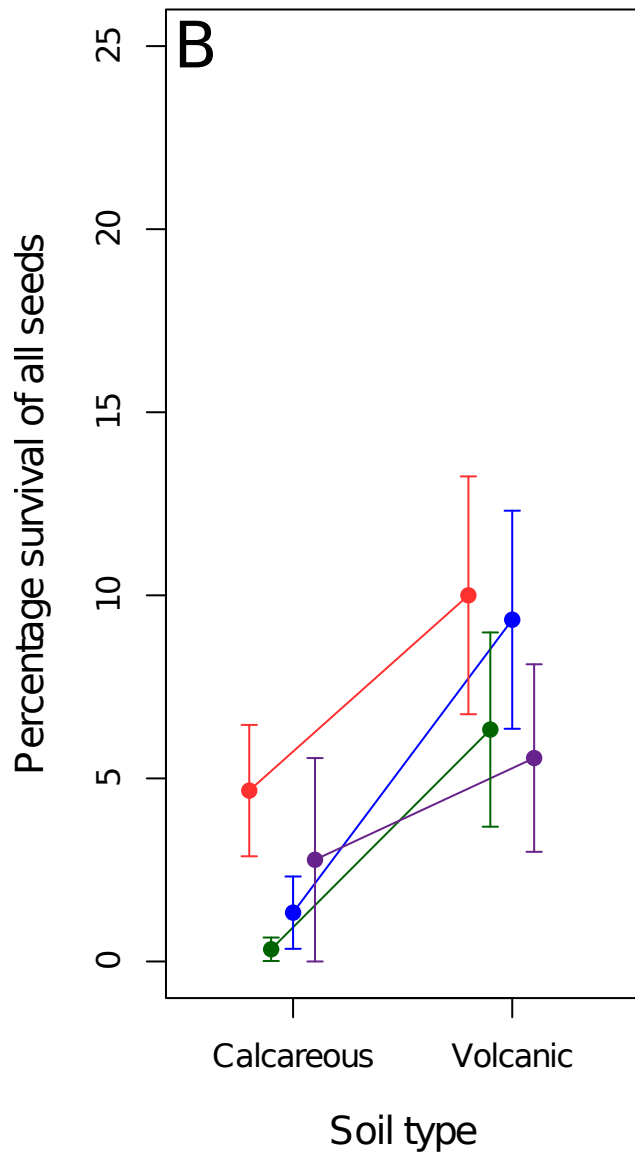

Supplement: JEB-29-2143-s002.pdf [file JEB-29-2143-s002.pdf]
